# Supplementary material for: Complex context relationships between DNA methylation and accessibility, histone marks, and hTERT gene expression in acute promyelocytic leukemia cells: perspectives for all‐trans retinoic acid in cancer therapy
Source: PubMed Central journal article supplement (PMC7266276; doi:10.1002/1878-0261.12681), 2020-04-22
Supplement: MOL2-14-1310-s001.pdf [file MOL2-14-1310-s001.pdf]

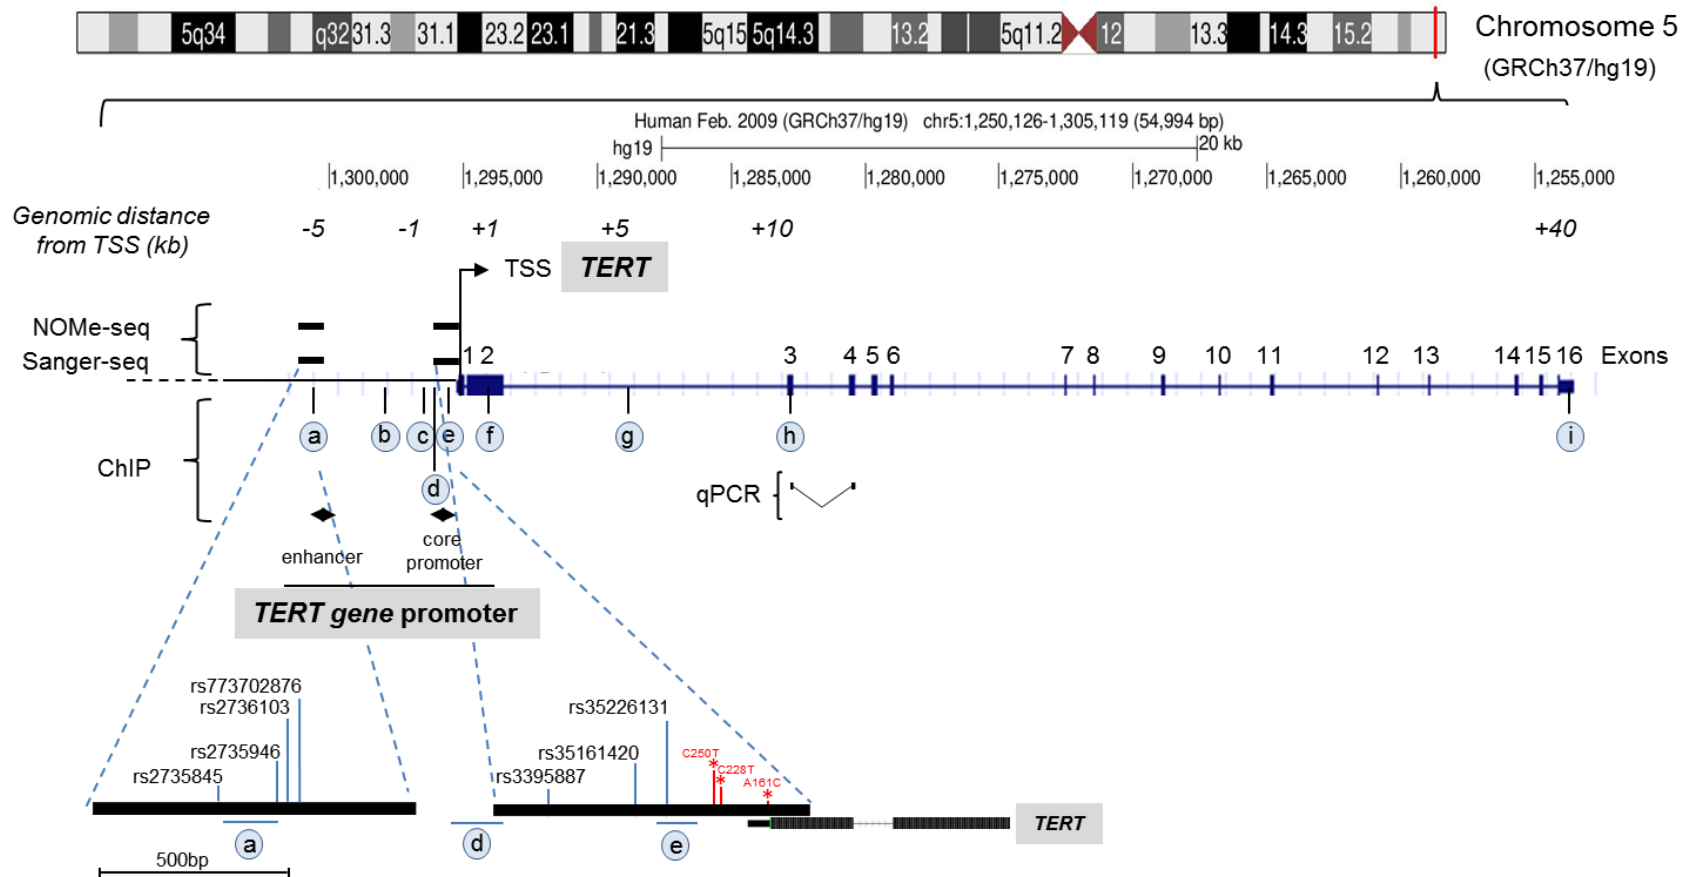

Garsuault et al. Supplemental Figure S1
