# Supplementary material for: Complex context relationships between DNA methylation and accessibility, histone marks, and hTERT gene expression in acute promyelocytic leukemia cells: perspectives for all‐trans retinoic acid in cancer therapy
Source: PubMed Central journal article supplement (PMC7266276; doi:10.1002/1878-0261.12681), 2020-04-22
Supplement: MOL2-14-1310-s005.pdf [file MOL2-14-1310-s005.pdf]

**Table S1: Primers sequences (5' to 3') and amplification conditions used for NoMe-seq, ChIP and *hTERT* expression and promoter gene analysis.** The positions of the amplicons are indicated in Fig S1.

| Primer name               | Primers*                                                                         | Annealing °C |
|---------------------------|----------------------------------------------------------------------------------|--------------|
| <b>Sequencing</b>         |                                                                                  |              |
| hTERT-5kbpromoter-seq     | FW : ACCCTTCTCAAGGGAAAACCAGA<br>RV : TGAATCATTCAATCCTTGGGG                       | 60           |
| hTERT-promoter-seq        | FW (-712) : AACAGATTTGGGGTGGTTTG<br>RV (-435) : CTGGCCTGATCCGGAGAC               | 54-56        |
|                           | FW (-514) : TCCCCTTCACGTCCGGCAT<br>RV (+53) : TCCCACGTGCGCAGCAGGAC               | 60           |
|                           | FW (-347) : GGCCGATTGACCTCTCT<br>RV (+120) : AGCACCTCGCGGTAGTGG                  | 60           |
| <b>NOMeSeq</b>            |                                                                                  |              |
| hTERT-5kbpromoter-NOMeSeq | FW-5kbBS3F : TTTGGAGAGAGGAGTTTGAG<br>RV-5kbBS2R : TCATTCAATCCTTAAAAATAAAAAATAATA | 51           |
| hTERT-promoter-NOMeSeq :  | FW BS1F : GGGYTTGTGTTAAGGAGYTAAAGT<br>RV BS3R : CCARCCCTAAARCCCAA                | 58           |
| <b>PCR</b>                |                                                                                  |              |
| hTERT-qPCR                | FW : CGGAAGAGTGTCTGGAGCAA<br>RV : CTCCCACGACGTAGTCCATG                           | 58           |
| GAPDH-qPCR                | FW : CACCCATGGCAAATTCATGGC                                                       | 58           |

|                                  |                                                            |    |
|----------------------------------|------------------------------------------------------------|----|
|                                  | RV : GCATTGCTGATGATCTTGAGGCT                               |    |
| <b>ChIP</b>                      |                                                            |    |
| hTERT-ChIP-up5kb<br>(-5401)      | FW : CCAAAGGCGTAAAACAGGAA<br>RV : CCTCGTGTACTTTCCCTTGC     | 60 |
| hTERT-ChIP-up2.5kb<br>(-2582)    | FW : AAACCTCCCTGGGCTCAAGT<br>RV : CGGTGTATCCCCAGTCTACG     | 60 |
| hTERT-ChIP-up1.0kb<br>(-1102)    | FW : GTTTCTCGCCCTTAGATCC<br>RV : GCAGGACAGCTGAGGACTTC      | 60 |
| hTERT-ChIP-up0.8kb<br>(-773)     | FW : CTCCATTTCCACCCTTTCT<br>RV : ACTTGGGCTCCTTGACACAG      | 60 |
| hTERT-ChIP-up0.2kb<br>(-233)     | FW : CAGGCCGGGCTCCCAGTGGA<br>RV : GGAAGGTGAAGGGGCAGGAC     | 65 |
| hTERT-ChIP-<br>down1.3kb (+1310) | FW : TGCCCCAGCGCTACTGGCAA<br>RV : TCGCAGCGGGCAGTGCGTCTTGA  | 67 |
| hTERT-ChIP-<br>down6.5kb         | FW : TGGCAACGCTTGTCACCTTA<br>RV : ACGTCAATCCATGTGAGGGG     | 60 |
| hTERT-ChIP-<br>down12.5kb        | FW : CGTCTTTCTTTTATGTCACGGAG<br>RV : AATGCTTTGCAACTTGCTCCA | 60 |
| hTERT-ChIP-<br>down41.7kb        | FW : CCATCCCCAGATTCGCCATT<br>RV : CTGTGTACAGGGCACACCTT     | 60 |

\*Y = C or T and R = A or G

**Table S2: List of single nucleotide polymorphisms (SNPs) identified by genetic sequencing of the hTERT promoter.**

| SNPs                                                                        | Allele                                         | References                                                                                                                              |
|-----------------------------------------------------------------------------|------------------------------------------------|-----------------------------------------------------------------------------------------------------------------------------------------|
| rs33958877<br>GRCh38.p12-g.1295567<br>GRCH37.p13-g.1295682                  | A/C (NB4-LR1 and NB4-LR1 <sup>SFD</sup> )      | (Montesanto et al., 2018)                                                                                                               |
| rs35161420<br>GRCh38.p12-g.1295337<br>GRCH37.p13-g.1295452                  | G/C (NB4-LR1 and NB4-LR1 <sup>SFD</sup> )      | (Montesanto et al., 2018)                                                                                                               |
| rs35226131<br>GRCh38.p12-g.1295258<br>GRCH37.p13-g.1295373                  | A/G (NB4-LR1 and NB4-LR1 <sup>SFD</sup> )      | (Montesanto et al., 2018)<br>(Zhang et al., 2016a)                                                                                      |
| rs2735845<br>GRCh38.p12-g.1300469<br>GRCH37.p13-g.1300584                   | C/G (NB4-LR1 and NB4-LR1 <sup>SFD</sup> )      | (Zhang et al., 2016b; Zhang et al., 2014)<br>(Pande et al., 2011)<br>(Beesley et al., 2011)<br>(Ge et al., 2016)<br>(Zhou et al., 2016) |
| rs27355946<br>GRCh38.p12-g.1300314<br>GRCH37.p13-g.1300429                  | A>C (NB4-LR1 and NB4-LR1 <sup>SFD</sup> )      | (Pande et al., 2011)                                                                                                                    |
| rs2736103<br>GRCh38.p12-g.1300286<br>GRCH37.p13-g.0300401                   | A>G (NB4-LR1 and NB4-LR1 <sup>SFD</sup> )      | (Pande et al., 2011)                                                                                                                    |
| rs773702876<br>GRCh38.p12-g.1300251_1300255<br>GRCH37.p13-g.1300366_1300370 | delTGCCT (NB4-LR1 and NB4-LR1 <sup>SFD</sup> ) | -                                                                                                                                       |

## Supplementary references

Beesley, J, Pickett, HA, Johnatty, SE, Dunning, AM, Chen, X, Li, J, Michailidou, K, Lu, Y, Rider, DN, Palmieri, RT, et al. (2011) Functional polymorphisms in the TERT promoter are associated with risk of serous epithelial ovarian and breast cancers. *PLoS One* **6**, e24987.

Ge, M, Shi, M, An, C, Yang, W, Nie, X, Zhang, J, Lv, Z, Li, J, Zhou, L, Du, Z, et al. (2016) Functional evaluation of TERT-CLPTM1L genetic variants associated with susceptibility of papillary thyroid carcinoma. *Scientific reports* **6**, 26037.

Montesanto, A, Bonfigli, AR, Crocco, P, Garagnani, P, De Luca, M, Boemi, M, Marasco, E, Pirazzini, C, Giuliani, C, Franceschi, C, et al. (2018) Genes associated with Type 2 Diabetes and vascular complications. *Aging (Albany NY)* **10**, 178-196.

Pande, M, Spitz, MR, Wu, X, Gorlov, IP, Chen, WV and Amos, CI (2011) Novel genetic variants in the chromosome 5p15.33 region associate with lung cancer risk. *Carcinogenesis* **32**, 1493-1499.

Zhang, M, Wang, Z, Obazee, O, Jia, J, Childs, EJ, Hoskins, J, Figlioli, G, Mocci, E, Collins, I, Chung, CC, et al. (2016a) Three new pancreatic cancer susceptibility signals identified on chromosomes 1q32.1, 5p15.33 and 8q24.21. *Oncotarget* **7**, 66328-66343.

Zhang, Y, Zhang, X, Zhang, H, Zhai, Y, Wang, Z, Li, P, Yu, L, Xia, X, Zhang, Y, Zeng, Y, et al. (2016b) Common variations in TERT-CLPTM1L locus are reproducibly associated with the risk of nasopharyngeal carcinoma in Chinese populations. *Oncotarget* **7**, 759-770.

Zhang, Y, Zhao, M, Shen, L, Ren, Y, Su, L, Li, X, Yin, Z and Zhou, B (2014) Genetic polymorphisms of TERT and CLPTM1L and risk of lung cancer: a case-control study in northeast Chinese male population. *Medical oncology* **31**, 18.

Zhou, L, Fu, G, Wei, J, Shi, J, Pan, W, Ren, Y, Xiong, X, Xia, J, Shen, Y, Li, H, et al. (2016) The identification of two regulatory ESCC susceptibility genetic variants in the TERT-CLPTM1L loci. *Oncotarget* **7**, 5495-5506.
